# Supplementary material for: Global DNA Adenine Methylation in Caenorhabditis elegans after Multigenerational Exposure to Silver Nanoparticles and Silver Nitrate
Source: MDPI journal article supplement (doi:10.3390/ijms24076168), 2023-03-24
Supplement: s1 [file s1]

## Supplementary Information

# Global DNA adenine methylation in *Caenorhabditis elegans* after multigenerational exposure to silver nanoparticles and silver nitrate

Anye Wamuchwo<sup>1,2,3</sup>, Jason Unrine<sup>1,4</sup>, John May<sup>1</sup> and Olga Tsyusko<sup>1,\*</sup>

<sup>1</sup> Department of Plant and Soil Sciences, University of Kentucky, Lexington, KY 40546, USA; [a.wamuchwo@uky.edu](mailto:a.wamuchwo@uky.edu) (A.W.); [jason.unrine@uky.edu](mailto:jason.unrine@uky.edu) (J.U.); [john.may@uky.edu](mailto:john.may@uky.edu) (J.M.)

<sup>2</sup> Department of Toxicology and Cancer Biology, University of Kentucky, Lexington, KY 40536, USA

<sup>3</sup> College of Pharmacy, 789 S Limestone Street, University of Kentucky, Lexington, KY 40506, USA

<sup>4</sup> Kentucky Water Resources Research Institute, 504 Rose Street, Lexington, KY 40506, USA

\* Correspondence: [olga.tsyusko@uky.edu](mailto:olga.tsyusko@uky.edu)

### LC-MS/MS Chromatograms.

The chromatograms of the 2' Deoxyadenosine (dA) standard are shown in **Figure S1** and the chromatogram of the N<sup>1</sup>-methyl-2'- deoxyadenosine (1mdA) and N<sup>6</sup>-methyl-2'- deoxyadenosine (6mdA) standards are shown in **Figure S2**. Representative chromatograms of one replicate for all generations for controls, AgNO<sub>3</sub>, pristine Ag-NPs, and sAg-NPs are shown in **Figures S3-S6** respectively.

Standard concentrations were selected based on *Caenorhabditis elegans* DNA sample test runs. Standards were ran through the same digestion process as the *C. elegans* DNA samples before subjected to HPLC-MS/MS and used to generate 1mdA and 6mdA linear standard curves for quantification of *C. elegans* 1mdA and 6mdA levels respectively. Quantification was accomplished in multiple reaction monitoring (MRM) by monitoring the transitions 266.0–150.0.

For the samples, a second peak corresponding to the monitored 266.0 to 150.0 transition was detected with a slightly lower retention time (approximately 5.25 minutes) compared to 6mdA as seen in **Figures S3-S6**. Test samples spiked with 6mdA prior to HPLC-MS/MS runs indicated that the peak does not correspond to 6mdA (data not shown). The retention time of the peak did not also correspond to 1mdA suggesting another potential methyl-2'-deoxyadenosine base in the *C. elegans* genome, potentially methylated at another position on the adenosine ring. dA and 6mdA levels were quantified using standard curves generated from the standards ran at the same time with the samples.

**Table S1** Assay IDs and efficiencies of TaqMan primer/probes used for qRT-PCR

| Gene symbol             | Gene name                                            | Assay ID      | Efficiency (%) |
|-------------------------|------------------------------------------------------|---------------|----------------|
| <i>damt-1</i> (C18A3.1) | DNA N <sup>6</sup> -methyl adenine methyltransferase | Ce02432992_g1 | 100.7          |
| <i>nmad-1</i> (F09F7.7) | DNA N <sup>6</sup> -methyl adenine demethylase       | Ce02406554_g1 | 97.1           |
| Y45F10D.4               | Uncharacterized                                      | Ce02467252_g1 | 100            |

## Figures

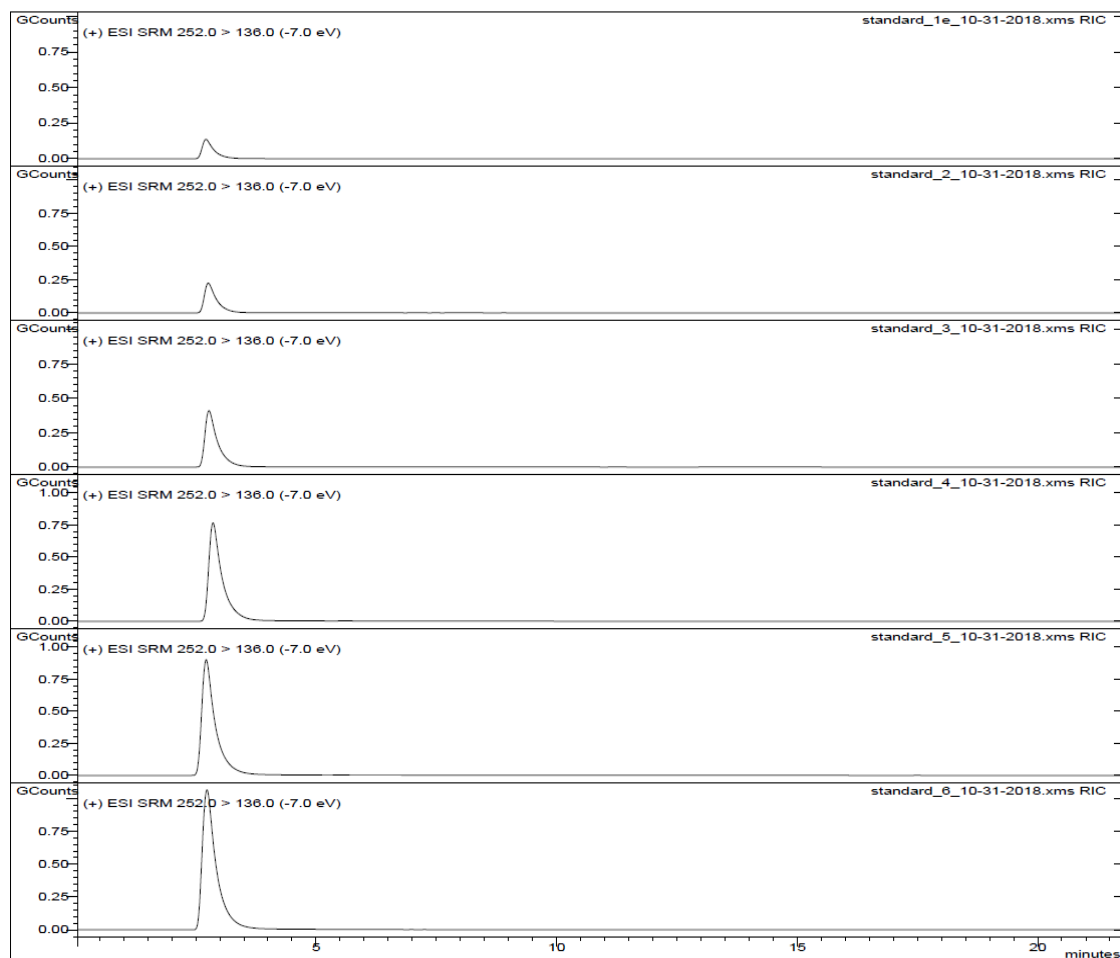

**Figure S1.** HPLC-MS/MS chromatograms of 2' Deoxyadenosine (dA) standard. The concentration for dA standards was between 0.5 mg/L – 10 mg/L. dA had a retention time of 2.7 minutes.

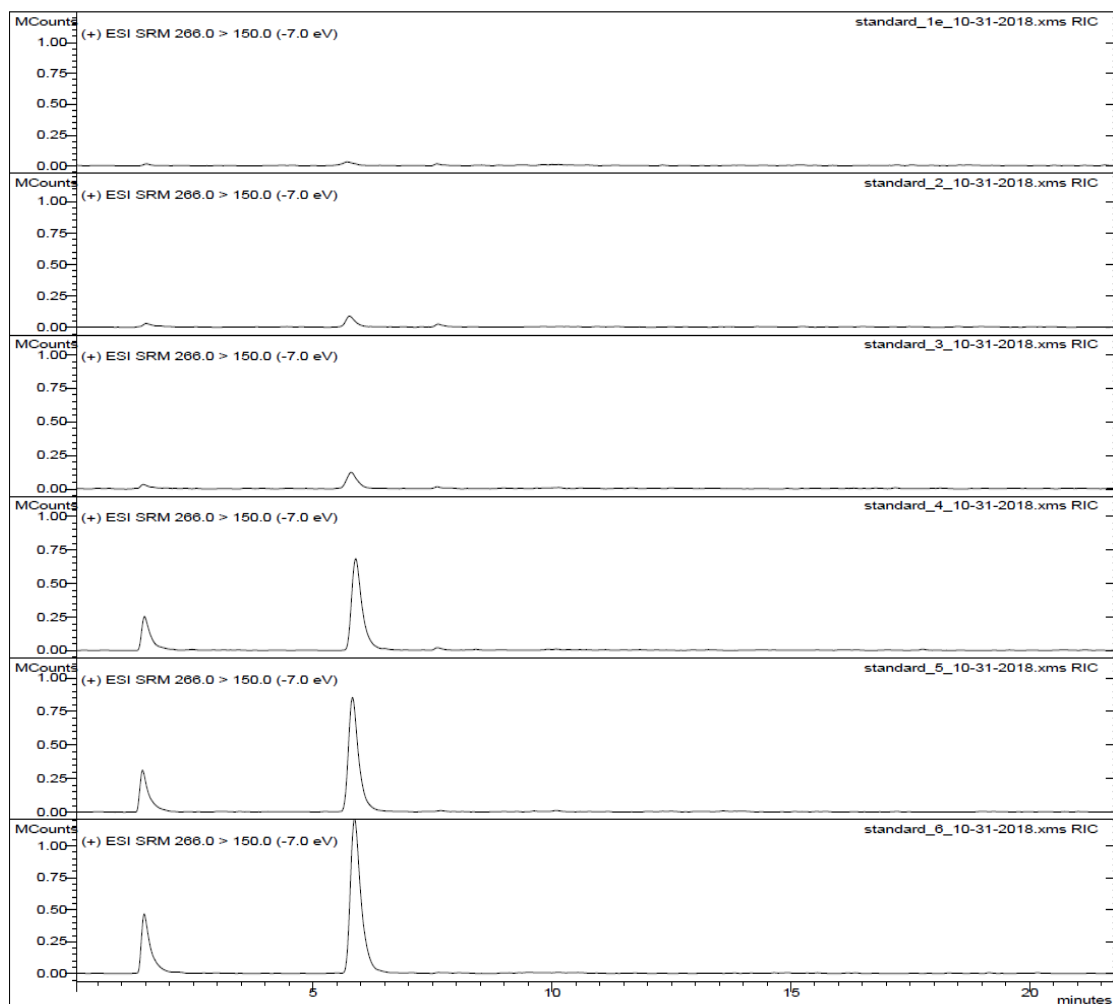

**Figure S2.** HPLC-MS/MS chromatograms of N<sup>1</sup>-methyl-2'- deoxyadenosine (1mdA) and N<sup>6</sup>-methyl-2'- deoxyadenosine (6mdA) standards. The concentration for both standards was between 0.025 µg/L – 1 mg/L. 1mdA had a retention time of 1.5 minutes and 6mdA had a retention time of 5.7 minutes.

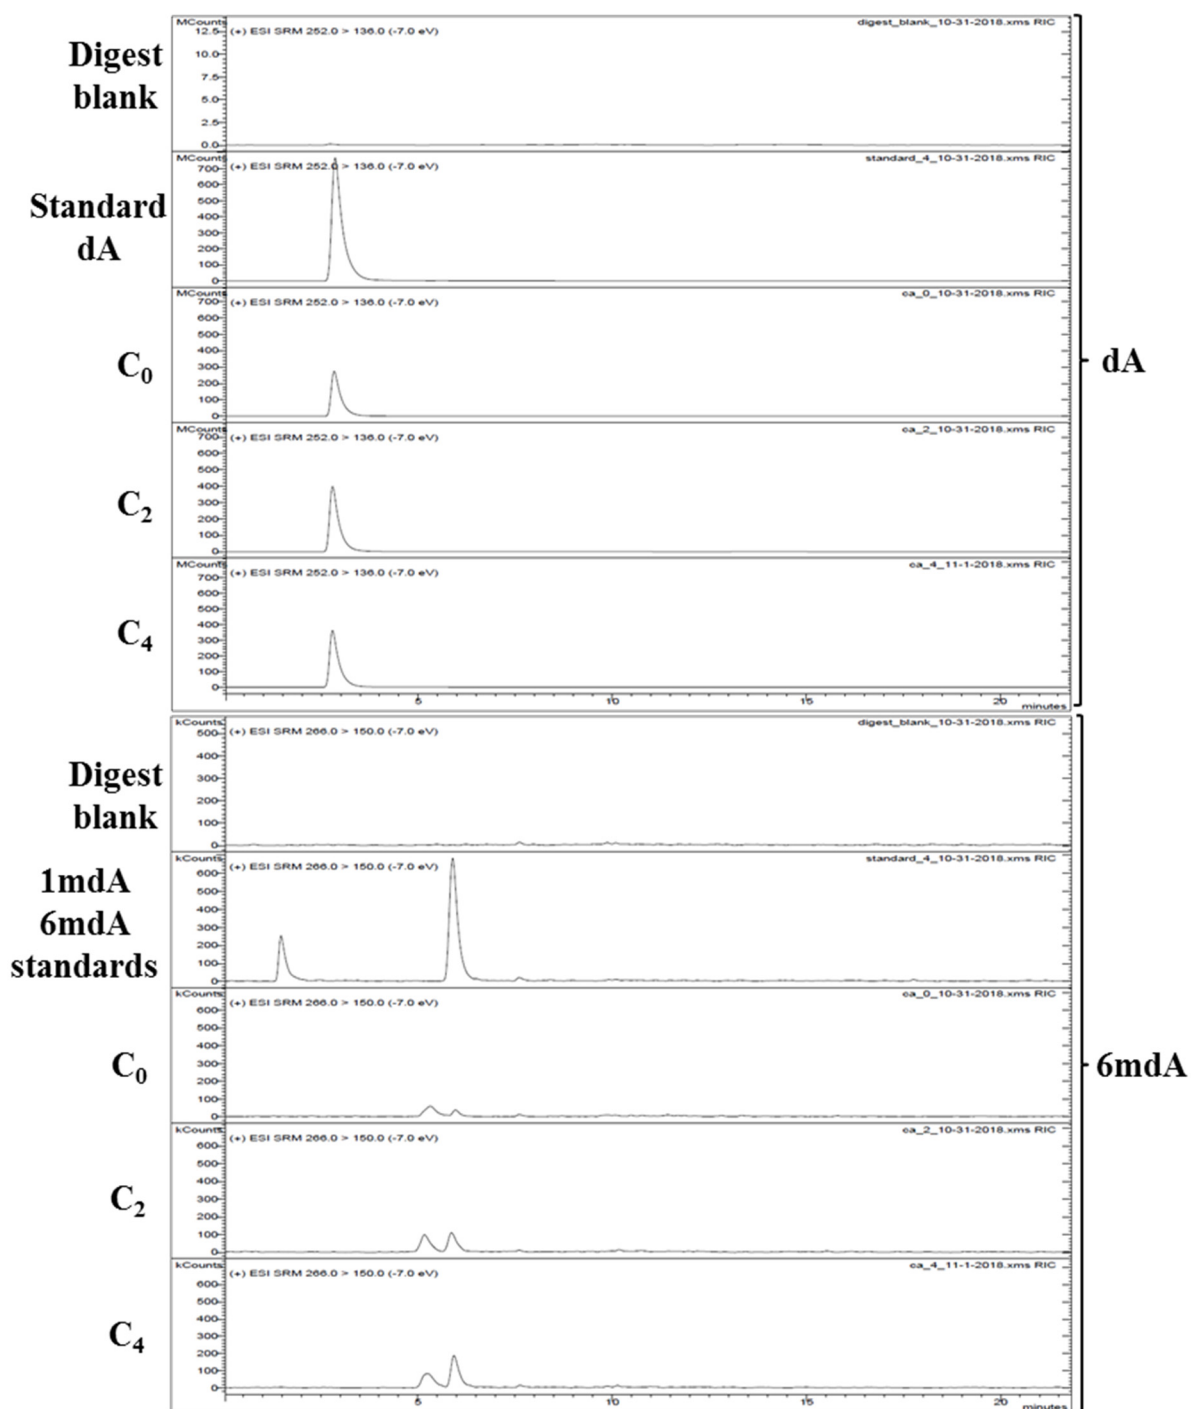

**Figure S3.** Representative HPLC-MS/MS chromatograms of 2' deoxyadenosine (dA), N<sup>1</sup>-methyl-2'- deoxyadenosine (1mdA), and N<sup>6</sup>-methyl-2'- deoxyadenosine (6mdA) of **control** *C. elegans* DNA samples. 1mdA was not detected for any sample.

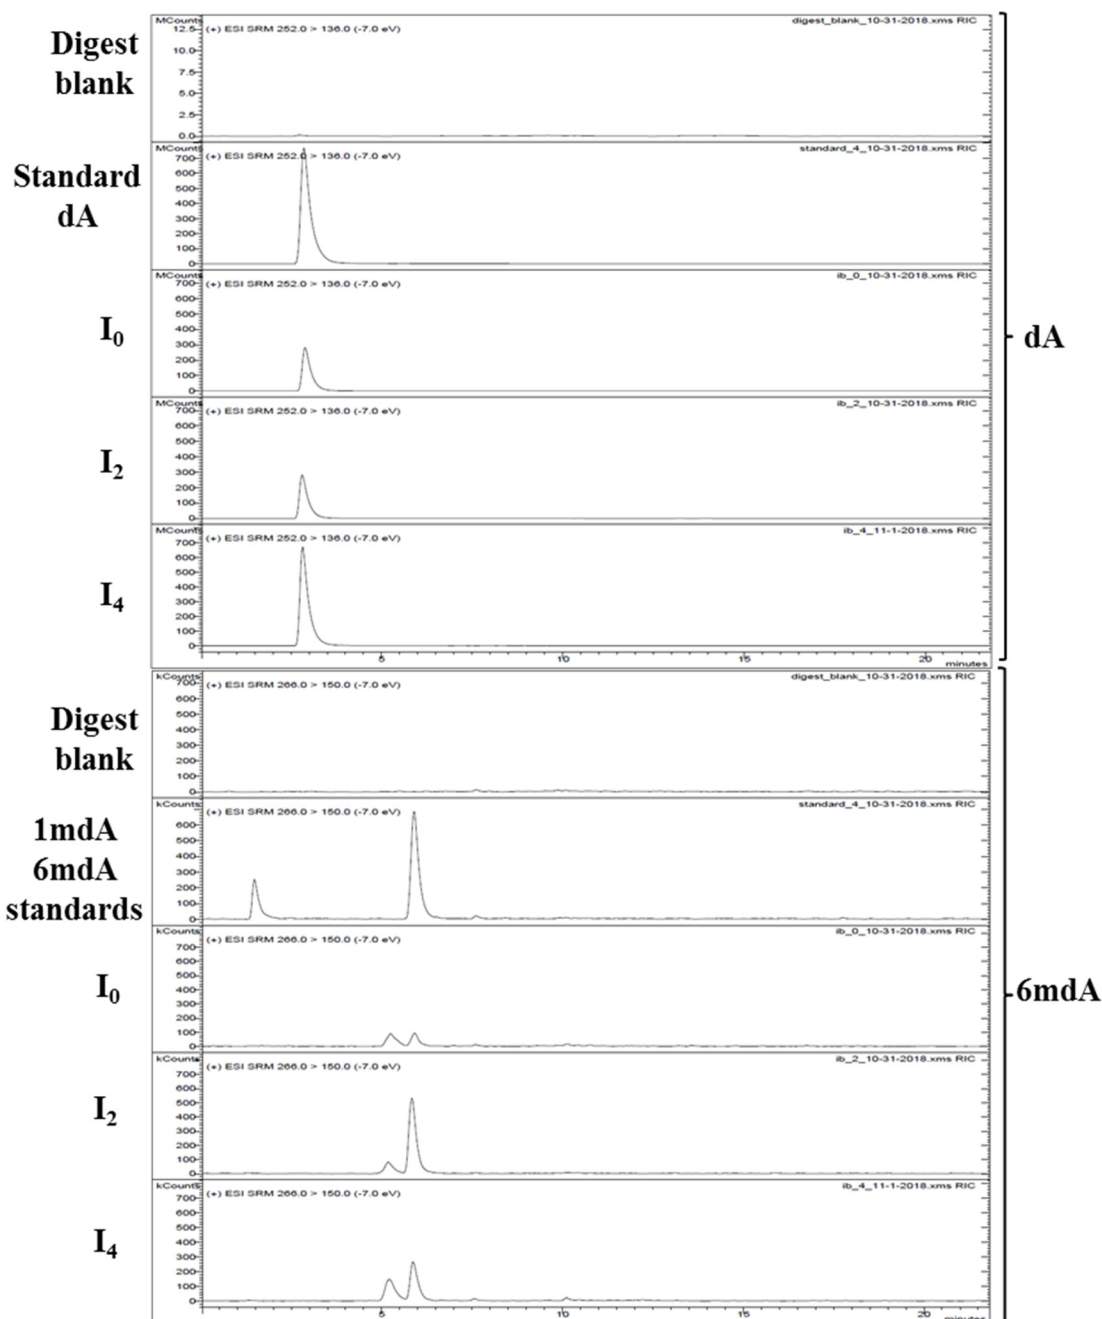

**Figure S4.** Representative HPLC-MS/MS chromatograms of 2' deoxyadenosine (dA), N1-methyl-2'- deoxyadenosine (1mdA), and N6-methyl-2'- deoxyadenosine (6mdA) of  $\text{AgNO}_3$  (I) exposed *C. elegans* DNA samples. 1mdA was not detected for any sample. 6mdA levels after two generations of exposures ( $F_2$ ) was significantly higher compared to the unexposed  $F_0$  as determined by the 6mdA/dA ratio. 6mdA levels returned to almost  $F_0$  levels after rescue for two generations from exposure ( $F_4$ ).

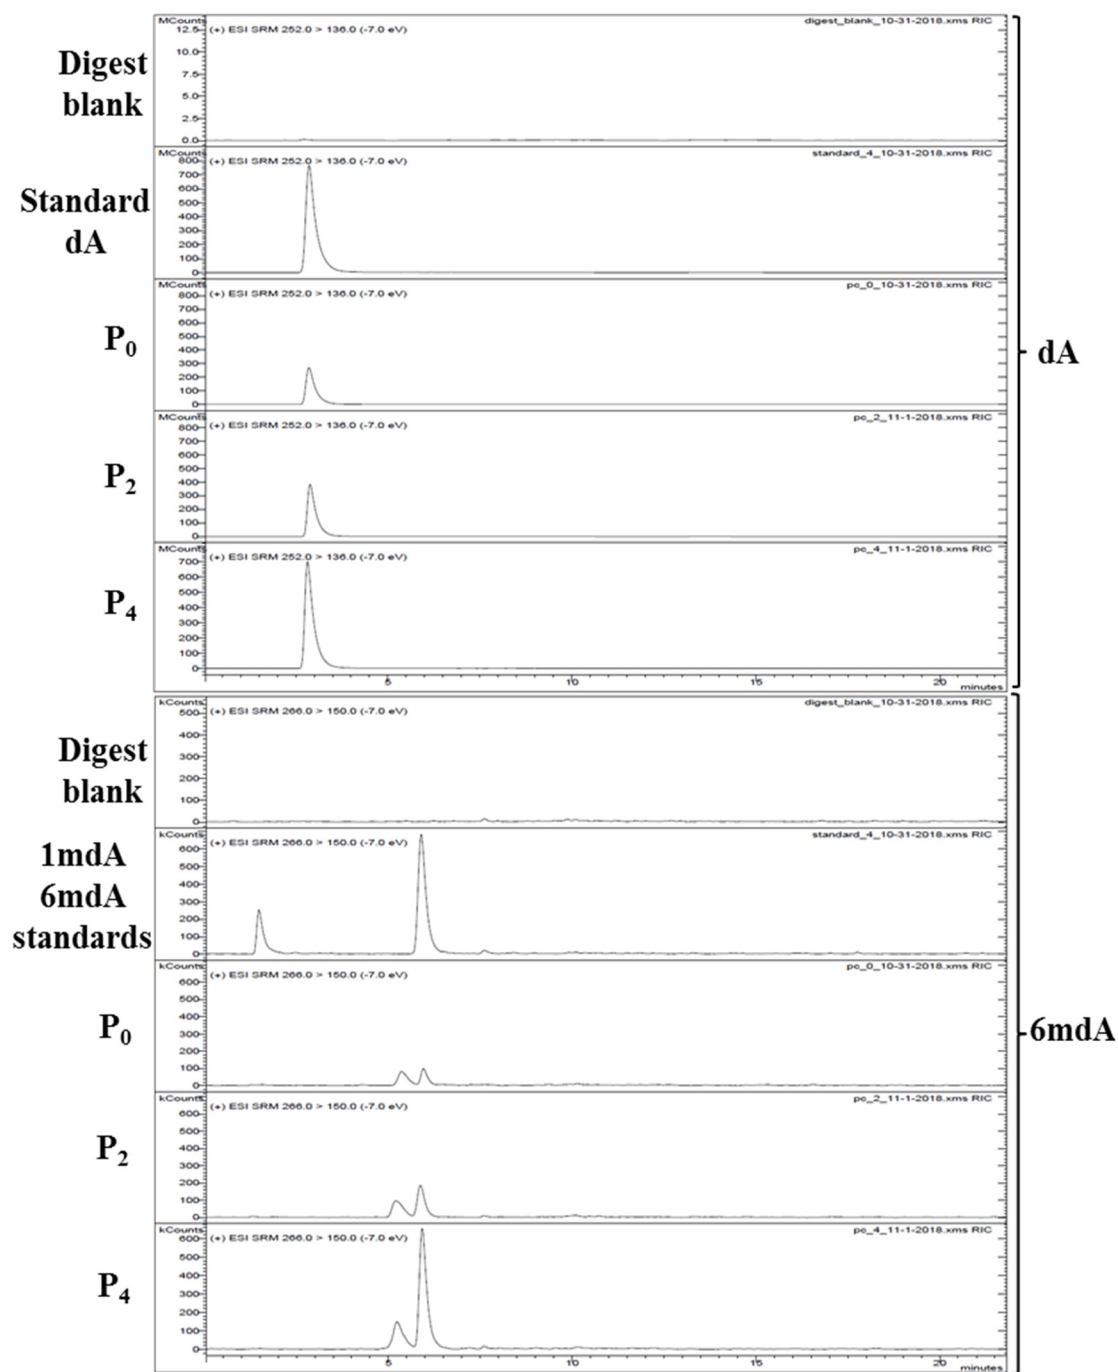

**Figure S5.** Representative HPLC-MS/MS chromatograms of 2' deoxyadenosine (dA), N<sup>1</sup>-methyl-2'- deoxyadenosine (1mdA), and N<sup>6</sup>-methyl-2'- deoxyadenosine (6mdA) of **pristine** Ag-NPs (P) exposed *C. elegans* DNA samples. 1mdA was not detected for any sample.

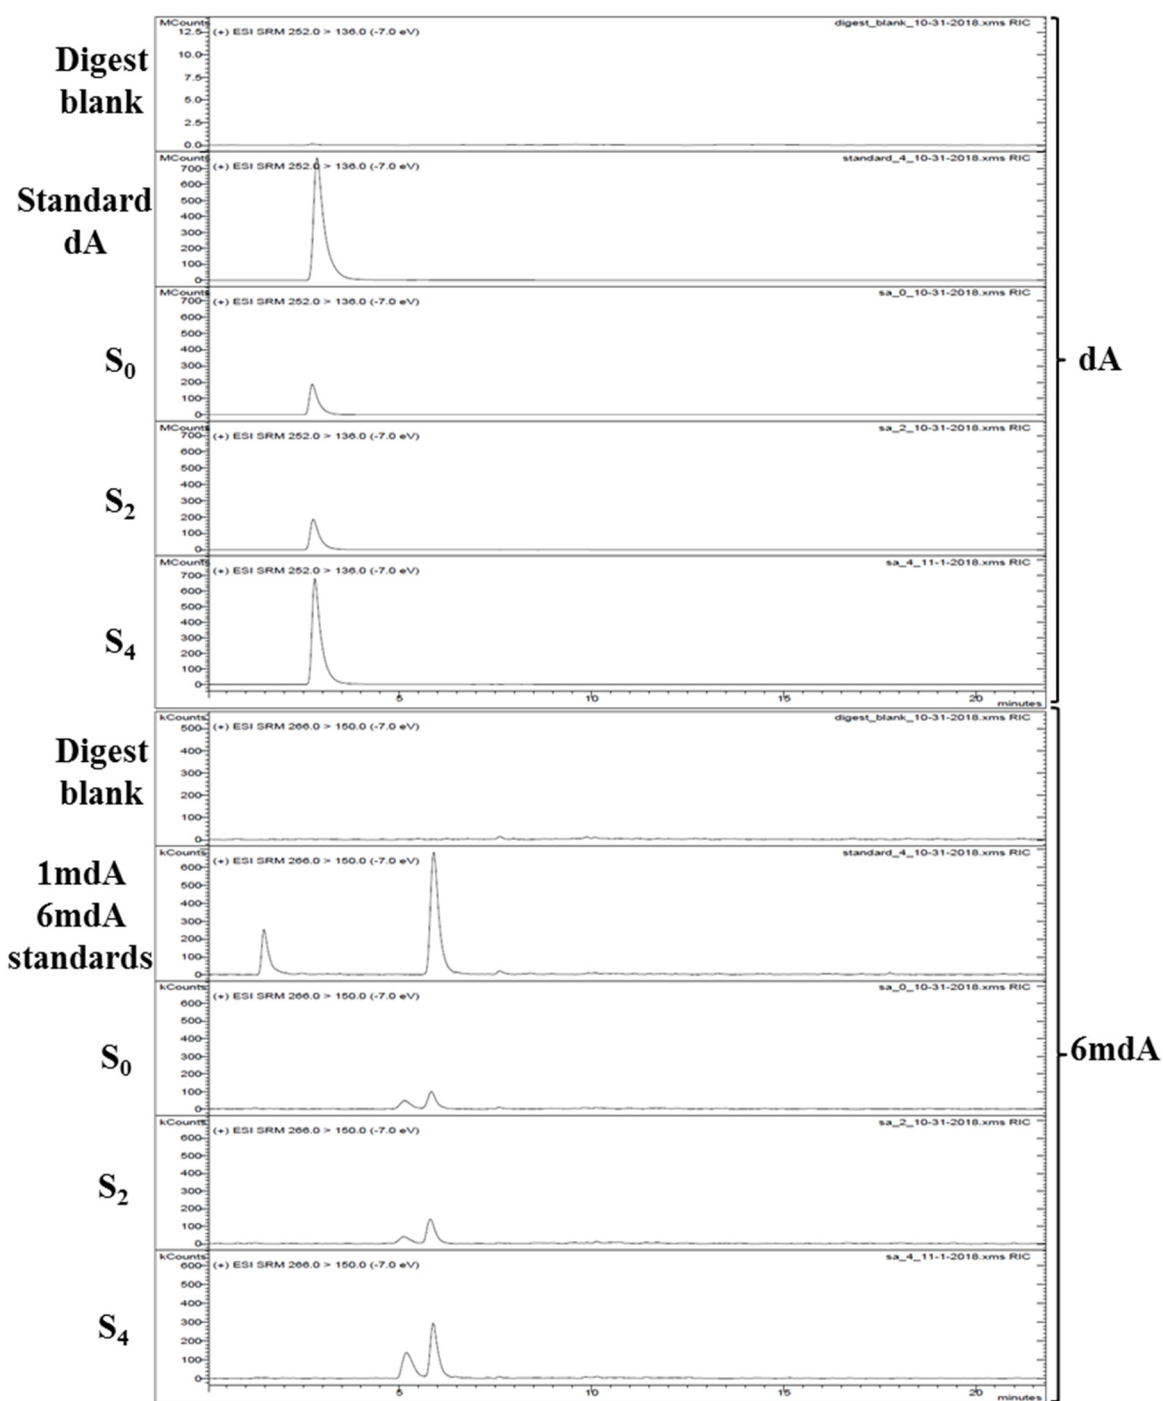

**Figure S6.** Representative HPLC-MS/MS chromatograms of 2' deoxyadenosine (dA), N1-methyl-2'- deoxyadenosine (1mdA), and N6-methyl-2'- deoxyadenosine (6mdA) of sulfidized (S) Ag-NP exposed *C. elegans* DNA samples. 1mdA was not detected for any sample.

**Stability of the Reference Gene:** An equivalent amount of total RNA from *Caenorhabditis elegans* exposed to control, AgNO<sub>3</sub>, pristine Ag-NPs, and sAg-NPs was converted to cDNA and the cDNA diluted up to 20-fold for qRT-PCR. The amplification curves of Y45F10D.4 gene under different treatments showed stable expression, indicating it can be used as a reference gene for relative quantification in our study.

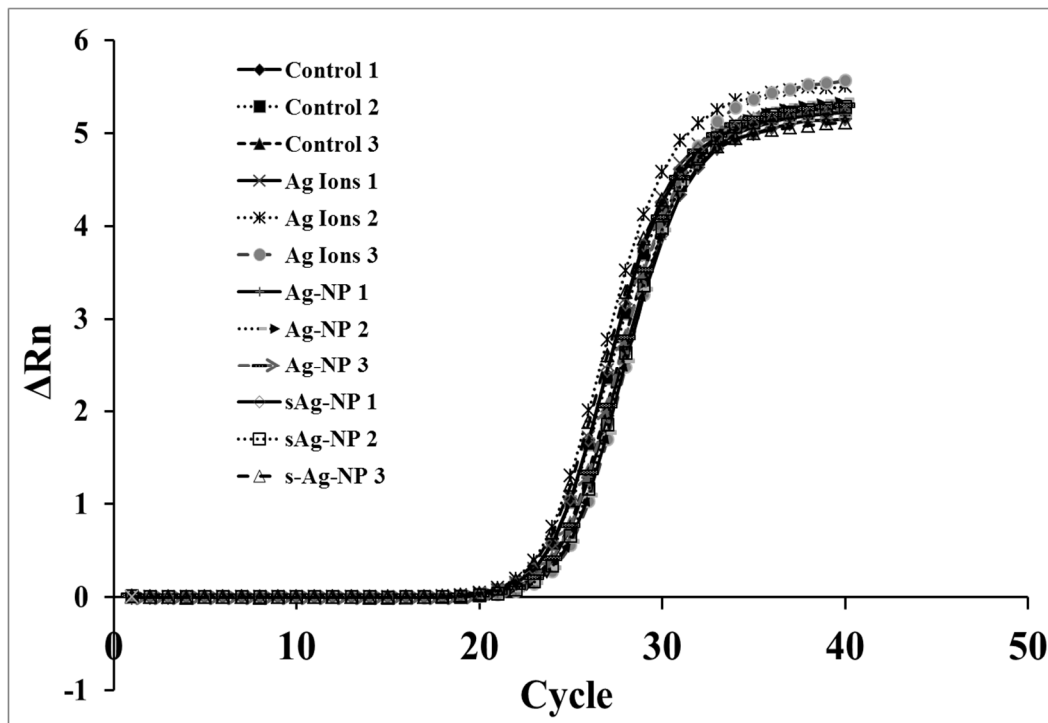

**Figure S7.** The quantitative real-time PCR (qRT-PCR) amplification curves of reference Y45F10D.4 gene expression in *C. elegans* from control, AgNO<sub>3</sub> (Ag<sup>+</sup> Ions), pristine Ag-NPs, and sulfidized Ag-NP (sAg-NPs) treatments.
